# Supplementary material for: Combinatorial Use of Chitosan Nanoparticles, Reversine, and Ionising Radiation on Breast Cancer Cells Associated with Mitosis Deregulation
Source: MDPI journal article supplement (doi:10.3390/biom9050186), 2019-05-12
Supplement: s1 [file s1]

## Combinatorial Use of Chitosan Nanoparticles, Reversine, and Ionising Radiation on Breast Cancer Cells Associated with Mitosis Deregulation

Sofia Piña Olmos <sup>1,2</sup>, Roberto Díaz Torres <sup>1</sup>, Eman Elbakrawy <sup>2</sup>, Louise Hughes <sup>2</sup>, Joseph Mckenna <sup>2</sup>, Mark A. Hill <sup>3</sup>, Munira Kadhim <sup>2</sup>, Patricia Ramírez Noguera <sup>1,\*</sup> and Victor M. Bolanos-Garcia <sup>2,\*</sup>

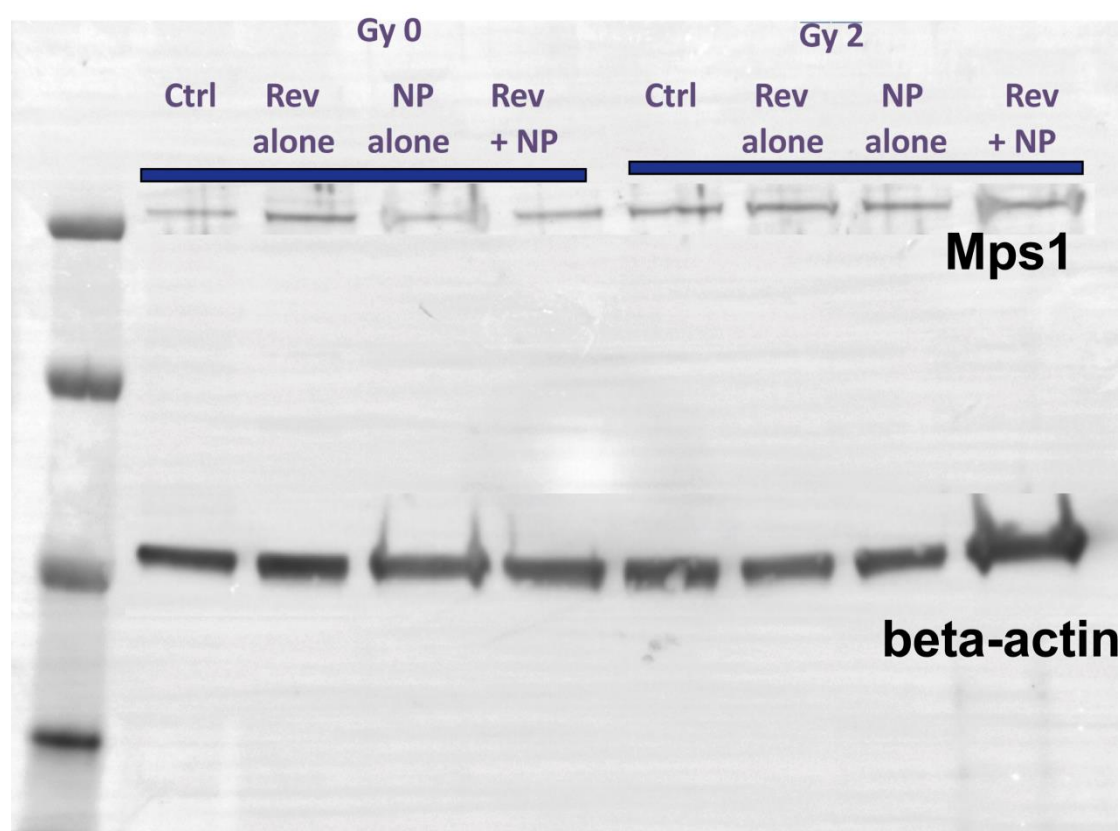

**Figure S1.** Western blot of the different samples studied using an anti-N-terminal Mps1 antibody. The abbreviations show here are the same as those described in the main text.
